# Supplementary material
Source: publisher figshare collection journal article supplement (https://gsajournals.figshare.com/ndownloader/files/13052780)
Supplement: Supplementary file 1 [file 13052780]

| **Experiment #** | ***Genotype*** | **RNAi** | **Drug Treatment** | **# Animals that did not reach adulthood** | **# Adults** | **Percentage of Animals that Developed to Adulthood** |
| --- | --- | --- | --- | --- | --- | --- |
| Experiment 1 | *hsf-1(sy441)* | daf-15 |  | 52 | 42 | 44.7 |
| Experiment 1 | *hsf-1(sy441)* | ifg-1 1% |  | 65 | 31 | 32.3 |
| Experiment 1 | *hsf-1(sy441)* | ifg-1 16% |  | 68 | 11 | 13.9 |
| Experiment 1 | *hsf-1(sy441)* | ifg-1 2% |  | 66 | 59 | 47.2 |
| Experiment 1 | *hsf-1(sy441)* | ifg-1 32% |  | 102 | 0 | 0.0 |
| Experiment 1 | *hsf-1(sy441)* | ifg-1 4% |  | 79 | 26 | 24.8 |
| Experiment 1 | *hsf-1(sy441)* | ifg-1 8% |  | 86 | 9 | 9.5 |
| Experiment 1 | *hsf-1(sy441)* | Vector Control |  | 76 | 44 | 36.7 |
| Experiment 1 | *hsf-1(sy441); rsks-1(mu482)* | Vector Control |  | 0 | 136 | 100.0 |
| Experiment 1 | *hsf-1(sy441); rsks-1(sv31)* | Vector Control |  | 0 | 63 | 100.0 |
| Experiment 1 | *wild-type* | ifg-1 16% |  | 1 | 76 | 98.7 |
| Experiment 1 | *wild-type* | ifg-1 32% |  | 6 | 70 | 92.1 |
| Experiment 1 | *wild-type* | ifg-1 4% |  | 0 | 67 | 100.0 |
| Experiment 1 | *wild-type* | ifg-1 8% |  | 1 | 71 | 98.6 |
| Experiment 2 | *hsf-1(sy441)* | ifg-1 1% |  | 44 | 16 | 26.7 |
| Experiment 2 | *hsf-1(sy441)* | ifg-1 100% |  | 98 | 0 | 0.0 |
| Experiment 2 | *hsf-1(sy441)* | ifg-1 16% |  | 83 | 6 | 6.7 |
| Experiment 2 | *hsf-1(sy441)* | ifg-1 2% |  | 78 | 12 | 13.3 |
| Experiment 2 | *hsf-1(sy441)* | ifg-1 32% |  | 76 | 0 | 0.0 |
| Experiment 2 | *hsf-1(sy441)* | ifg-1 4% |  | 22 | 7 | 24.1 |
| Experiment 2 | *hsf-1(sy441)* | ifg-1 8% |  | 83 | 8 | 8.8 |
| Experiment 2 | *hsf-1(sy441)* | rsks-1 |  | 41 | 62 | 60.2 |
| Experiment 2 | *hsf-1(sy441)* | Vector Control |  | 94 | 29 | 23.6 |
| Experiment 2 | *hsf-1(sy441); rsks-1(mu482)* | ifg-1 32% |  | 8 | 30 | 78.9 |
| Experiment 2 | *hsf-1(sy441); rsks-1(mu482)* | Vector Control |  | 1 | 37 | 97.4 |
| Experiment 2 | *wild-type* | ifg-1 100% |  | 55 | 1 | 1.8 |
| Experiment 2 | *wild-type* | ifg-1 16% |  | 9 | 46 | 83.6 |
| Experiment 2 | *wild-type* | ifg-1 32% |  | 17 | 43 | 71.7 |
| Experiment 3 | *hsf-1(sy441)* | rps-6 1.5% |  | 73 | 4 | 5.2 |
| Experiment 3 | *hsf-1(sy441)* | rps-6 100% |  | 157 | 0 | 0.0 |
| Experiment 3 | *hsf-1(sy441)* | rps-6 12.5% |  | 23 | 0 | 0.0 |
| Experiment 3 | *hsf-1(sy441)* | rps-6 25% |  | 105 | 2 | 1.9 |
| Experiment 3 | *hsf-1(sy441)* | rps-6 50% |  | 126 | 0 | 0.0 |
| Experiment 3 | *hsf-1(sy441)* | rsks-1 |  | 55 | 65 | 54.2 |
| Experiment 3 | *hsf-1(sy441)* | Vector Control |  | 103 | 47 | 31.3 |
| Experiment 3 | *hsf-1(sy441); rsks-1(mu482)* | rps-6 100% |  | 134 | 8 | 5.6 |
| Experiment 3 | *hsf-1(sy441); rsks-1(mu482)* | Vector Control |  | 0 | 138 | 100.0 |
| Experiment 3 | *wild-type* | rps-6 1.5% |  | 0 | 87 | 100.0 |
| Experiment 3 | *wild-type* | rps-6 100% |  | 76 | 0 | 0.0 |
| Experiment 3 | *wild-type* | rps-6 12.5% |  | 3 | 58 | 95.1 |
| Experiment 3 | *wild-type* | rps-6 25% |  | 15 | 57 | 79.2 |
| Experiment 3 | *wild-type* | rps-6 3.125% |  | 0 | 103 | 100.0 |
| Experiment 3 | *wild-type* | rps-6 50% |  | 58 | 11 | 15.9 |
| Experiment 3 | *wild-type* | rps-6 6.25% |  | 0 | 97 | 100.0 |
| Experiment 4 | *hsf-1(sy441)* | ifg-1 1% |  | 77 | 58 | 43.0 |
| Experiment 4 | *hsf-1(sy441)* | ifg-1 100% |  | 138 | 4 | 2.8 |
| Experiment 4 | *hsf-1(sy441)* | ifg-1 16% |  | 103 | 4 | 3.7 |
| Experiment 4 | *hsf-1(sy441)* | ifg-1 2% |  | 57 | 53 | 48.2 |
| Experiment 4 | *hsf-1(sy441)* | ifg-1 32% |  | 112 | 5 | 4.3 |
| Experiment 4 | *hsf-1(sy441)* | ifg-1 4% |  | 87 | 39 | 31.0 |
| Experiment 4 | *hsf-1(sy441)* | ifg-1 8% |  | 120 | 17 | 12.4 |
| Experiment 4 | *hsf-1(sy441)* | rsks-1 |  | 22 | 158 | 87.8 |
| Experiment 4 | *hsf-1(sy441)* | Vector Control |  | 158 | 60 | 27.5 |
| Experiment 4 | *hsf-1(sy441); rsks-1(mu482)* | ifg-1 100% |  | 78 | 42 | 35.0 |
| Experiment 4 | *hsf-1(sy441); rsks-1(mu482)* | ifg-1 16% |  | 0 | 110 | 100.0 |
| Experiment 4 | *hsf-1(sy441); rsks-1(mu482)* | ifg-1 32% |  | 25 | 71 | 74.0 |
| Experiment 4 | *hsf-1(sy441); rsks-1(mu482)* | ifg-1 8% |  | 6 | 137 | 95.8 |
| Experiment 4 | *hsf-1(sy441); rsks-1(mu482)* | Vector Control |  | 0 | 142 | 100.0 |
| Experiment 4 | *wild-type* | ifg-1 16% |  | 8 | 133 | 94.3 |
| Experiment 4 | *wild-type* | ifg-1 32% |  | 6 | 127 | 95.5 |
| Experiment 4 | *wild-type* | ifg-1 8% |  | 0 | 113 | 100.0 |
| Experiment 5 | *wild-type* | Vector Control | 0.37% DMSO | 0 | 110 | 100.0 |
| Experiment 5 | *wild-type* | Vector Control | 2.9uM salubrinal | 2 | 90 | 97.8 |
| Experiment 5 | *wild-type* | Vector Control | 185.2uM salubrinal | 10 | 84 | 89.4 |
| Experiment 5 | *wild-type* | Vector Control | 23.1uM salubrinal | 6 | 84 | 93.3 |
| Experiment 5 | *wild-type* | Vector Control | 362nM salubrinal | 0 | 98 | 100.0 |
| Experiment 5 | *wild-type* | Vector Control | 46.3uM salubrinal | 2 | 110 | 98.2 |
| Experiment 5 | *wild-type* | Vector Control | 5.8uM salubrinal | 1 | 106 | 99.1 |
| Experiment 5 | *wild-type* | Vector Control | 723nM salubrinal | 2 | 128 | 98.5 |
| Experiment 5 | *wild-type* | Vector Control | 92.6uM salubrinal | 2 | 100 | 98.0 |
| Experiment 5 | *wild-type* | Vector Control | 11.6uM salubrinal | 8 | 72 | 90.0 |
| Experiment 5 | *wild-type* | Vector Control | 1.4uM salubrinal | 0 | 107 | 100.0 |
| Experiment 6 | *wild-type* | Vector Control | 0.1% DMSO | 0 | 107 | 100.0 |
| Experiment 6 | *wild-type* | Vector Control | 2.9uM harringtonine | 0 | 108 | 100.0 |
| Experiment 6 | *wild-type* | Vector Control | 185.2uM harringtonine | 87 | 20 | 18.7 |
| Experiment 6 | *wild-type* | Vector Control | 23.1uM harringtonine | 1 | 97 | 99.0 |
| Experiment 6 | *wild-type* | Vector Control | 362nM harringtonine | 2 | 102 | 98.1 |
| Experiment 6 | *wild-type* | Vector Control | 370.4uM harringtonine | 40 | 55 | 57.9 |
| Experiment 6 | *wild-type* | Vector Control | 46.3uM harringtonine | 1 | 101 | 99.0 |
| Experiment 6 | *wild-type* | Vector Control | 5.8uM harringtonine | 0 | 78 | 100.0 |
| Experiment 6 | *wild-type* | Vector Control | 723nM harringtonine | 0 | 77 | 100.0 |
| Experiment 6 | *wild-type* | Vector Control | 92.6uM harringtonine | 29 | 60 | 67.4 |
| Experiment 6 | *wild-type* | Vector Control | 11.6uM harringtonine | 0 | 94 | 100.0 |
| Experiment 6 | *wild-type* | Vector Control | 1.4uM harringtonine | 0 | 85 | 100.0 |
| Experiment 7 | *hsf-1(sy441)* | rps-6 0.09% |  | 92 | 27 | 22.7 |
| Experiment 7 | *hsf-1(sy441)* | rps-6 0.18% |  | 87 | 52 | 37.4 |
| Experiment 7 | *hsf-1(sy441)* | rps-6 0.37% |  | 44 | 79 | 64.2 |
| Experiment 7 | *hsf-1(sy441)* | rps-6 0.75% |  | 80 | 55 | 40.7 |
| Experiment 7 | *hsf-1(sy441)* | rps-6 1.5% |  | 107 | 80 | 42.8 |
| Experiment 7 | *hsf-1(sy441)* | rps-6 12.5% |  | 105 | 46 | 30.5 |
| Experiment 7 | *hsf-1(sy441)* | rps-6 3.125% |  | 75 | 39 | 34.2 |
| Experiment 7 | *hsf-1(sy441)* | rps-6 6.25% |  | 68 | 44 | 39.3 |
| Experiment 7 | *hsf-1(sy441)* | Vector Control |  | 82 | 72 | 46.8 |
| Experiment 7 | *wild-type* | rps-6 100% |  | 76 | 16 | 17.4 |
| Experiment 7 | *wild-type* | rps-6 12.5% |  | 0 | 128 | 100.0 |
| Experiment 7 | *wild-type* | rps-6 25% |  | 33 | 127 | 79.4 |
| Experiment 7 | *wild-type* | rps-6 50% |  | 56 | 45 | 44.6 |
| Experiment 7 | *wild-type* | rps-6 6.5% |  | 0 | 103 | 100.0 |
| Experiment 7 | *wild-type* | Vector Control |  | 0 | 101 | 100.0 |
| Experiment 8 | *hsf-1(sy441); rsks-1(mu482)* | Vector Control |  | 1 | 158 | 99.4 |
| Experiment 8 | *hsf-1(sy441)* | rps-6 0.045% |  | 76 | 77 | 50.3 |
| Experiment 8 | *hsf-1(sy441)* | rps-6 0.09% |  | 60 | 72 | 54.5 |
| Experiment 8 | *hsf-1(sy441)* | rps-6 0.18% |  | 82 | 78 | 48.8 |
| Experiment 8 | *hsf-1(sy441)* | rps-6 0.37% |  | 27 | 38 | 58.5 |
| Experiment 8 | *hsf-1(sy441)* | rps-6 0.75% |  | 52 | 79 | 60.3 |
| Experiment 8 | *hsf-1(sy441)* | rps-6 1.5% |  | 52 | 39 | 42.9 |
| Experiment 8 | *hsf-1(sy441)* | rps-6 12.5% |  | 80 | 70 | 46.7 |
| Experiment 8 | *hsf-1(sy441)* | rps-6 25% |  | 72 | 48 | 40.0 |
| Experiment 8 | *hsf-1(sy441)* | rps-6 3.125% |  | 38 | 85 | 69.1 |
| Experiment 8 | *hsf-1(sy441)* | rps-6 6.25% |  | 107 | 109 | 50.5 |
| Experiment 8 | *hsf-1(sy441)* | rsks-1 |  | 27 | 116 | 81.1 |
| Experiment 8 | *hsf-1(sy441)* | Vector Control |  | 62 | 110 | 64.0 |
| Experiment 8 | *hsf-1(sy441); rsks-1(mu482)* | Vector Control |  | 1 | 158 | 99.4 |
| Experiment 8 | *wild-type* | rps-6 100% |  | 150 | 0 | 0.0 |
| Experiment 8 | *wild-type* | rps-6 12.5% |  | 16 | 89 | 84.8 |
| Experiment 8 | *wild-type* | rps-6 25% |  | 21 | 117 | 84.8 |
| Experiment 8 | *wild-type* | rps-6 50% |  | 90 | 9 | 9.1 |
| Experiment 8 | *wild-type* | Vector Control |  | 0 | 127 | 100.0 |
| Experiment 9 | *hsf-1(sy441)* | rps-6 0.045% |  | 82 | 48 | 36.9 |
| Experiment 9 | *hsf-1(sy441)* | rps-6 0.09% |  | 64 | 54 | 45.8 |
| Experiment 9 | *hsf-1(sy441)* | rps-6 0.18% |  | 94 | 44 | 31.9 |
| Experiment 9 | *hsf-1(sy441)* | rps-6 0.37% |  | 67 | 41 | 38.0 |
| Experiment 9 | *hsf-1(sy441)* | rps-6 0.75% |  | 67 | 39 | 36.8 |
| Experiment 9 | *hsf-1(sy441)* | rps-6 1.5% |  | 80 | 25 | 23.8 |
| Experiment 9 | *hsf-1(sy441)* | rps-6 12.5% |  | 82 | 19 | 18.8 |
| Experiment 9 | *hsf-1(sy441)* | rps-6 25% |  | 84 | 20 | 19.2 |
| Experiment 9 | *hsf-1(sy441)* | rps-6 3.125% |  | 71 | 47 | 39.8 |
| Experiment 9 | *hsf-1(sy441)* | rps-6 6.25% |  | 57 | 39 | 40.6 |
| Experiment 9 | *hsf-1(sy441)* | rsks-1 |  | 36 | 94 | 72.3 |
| Experiment 9 | *hsf-1(sy441)* | Vector Control |  | 107 | 34 | 24.1 |
| Experiment 9 | *wild-type* | rps-6 100% |  | 89 | 0 | 0.0 |
| Experiment 9 | *wild-type* | rps-6 12.5% |  | 0 | 139 | 100.0 |
| Experiment 9 | *wild-type* | rps-6 25% |  | 13 | 116 | 89.9 |
| Experiment 9 | *wild-type* | rps-6 50% |  | 68 | 49 | 41.9 |
| Experiment 9 | *wild-type* | Vector Control |  | 0 | 105 | 100.0 |
| Experiment 10 | *hsf-1(sy441)* | Vector Control | 23nM salubrinal | 57 | 12 | 17.4 |
| Experiment 10 | *hsf-1(sy441)* | Vector Control | 45nM salubrinal | 91 | 20 | 18.0 |
| Experiment 10 | *hsf-1(sy441)* | Vector Control | 90nM salubrinal | 87 | 7 | 7.4 |
| Experiment 10 | *hsf-1(sy441)* | Vector Control | 181nM salubrinal | 97 | 7 | 6.7 |
| Experiment 10 | *hsf-1(sy441)* | Vector Control | 0.37% DMSO | 97 | 13 | 11.8 |
| Experiment 10 | *hsf-1(sy441)* | rsks-1 | 0.37%DMSO | 55 | 20 | 26.7 |
| Experiment 10 | *hsf-1(sy441)* | Vector Control | 362nM salubrinal | 67 | 21 | 23.9 |
| Experiment 10 | *hsf-1(sy441)* | Vector Control | 723nM salubrinal | 66 | 28 | 29.8 |
| Experiment 10 | *hsf-1(sy441)* | Vector Control | 1.4uM salubrinal | 54 | 22 | 28.9 |
| Experiment 10 | *hsf-1(sy441)* | Vector Control | 1.56uM salubrinal | 82 | 5 | 5.7 |
| Experiment 10 | *hsf-1(sy441)* | Vector Control | 23.1uM salubrinal | 68 | 1 | 1.4 |
| Experiment 10 | *hsf-1(sy441)* | Vector Control | 5.8uM salubrinal | 96 | 6 | 5.9 |
| Experiment 10 | *hsf-1(sy441)* | Vector Control | 11.6uM salubrinal | 78 | 0 | 0.0 |
| Experiment 10 | *hsf-1(sy441)* | Vector Control |  | 79 | 39 | 33.1 |
| Experiment 10 | *hsf-1(sy441); rsks-1(mu482)* | Vector Control | 23.1uM salubrinal | 68 | 10 | 12.8 |
| Experiment 10 | *wild-type* | Vector Control | 0.37% DMSO | 0 | 101 | 100.0 |
| Experiment 10 | *wild-type* | Vector Control | 5.8uM salubrinal | 0 | 83 | 100.0 |
| Experiment 10 | *wild-type* | Vector Control | 11.6uM salubrinal | 0 | 97 | 100.0 |
| Experiment 10 | *wild-type* | Vector Control |  | 0 | 67 | 100.0 |
| Experiment 11 | *hsf-1(sy441)* | Vector Control | 181nM salubrinal | 82 | 16 | 16.3 |
| Experiment 11 | *hsf-1(sy441)* | Vector Control | 45nM salubrinal | 82 | 19 | 18.8 |
| Experiment 11 | *hsf-1(sy441)* | Vector Control | 90nM salubrinal | 82 | 13 | 13.7 |
| Experiment 11 | *hsf-1(sy441)* | rsks-1 | 0.19%DMSO | 11 | 7 | 38.9 |
| Experiment 11 | *hsf-1(sy441)* | Vector Control | 0.19%DMSO | 47 | 4 | 7.8 |
| Experiment 11 | *hsf-1(sy441)* | Vector Control | 181nM salubrinal | 99 | 16 | 13.9 |
| Experiment 11 | *hsf-1(sy441)* | Vector Control | 0.37% DMSO | 83 | 7 | 7.8 |
| Experiment 11 | *hsf-1(sy441)* | Vector Control | 362nM salubrinal | 95 | 12 | 11.2 |
| Experiment 11 | *hsf-1(sy441)* | Vector Control | 723nM salubrinal | 87 | 33 | 27.5 |
| Experiment 11 | *hsf-1(sy441)* | Vector Control | 1.4uM salubrinal | 69 | 19 | 21.6 |
| Experiment 11 | *hsf-1(sy441)* | Vector Control | 2.9uM salubrinal | 96 | 19 | 16.5 |
| Experiment 11 | *hsf-1(sy441)* | Vector Control | 23.1uM salubrinal | 90 | 3 | 3.2 |
| Experiment 11 | *hsf-1(sy441)* | Vector Control | 5.8uM salubrinal | 74 | 6 | 7.5 |
| Experiment 11 | *hsf-1(sy441)* | Vector Control | 11.6uM salubrinal | 81 | 1 | 1.2 |
| Experiment 11 | *hsf-1(sy441)* | Vector Control |  | 48 | 27 | 36.0 |
| Experiment 11 | *hsf-1(sy441); rsks-1(mu482)* | Vector Control | 5.8uM salubrinal | 65 | 59 | 47.6 |
| Experiment 11 | *hsf-1(sy441); rsks-1(mu482)* | Vector Control | 11.6uM salubrinal | 51 | 21 | 29.2 |
| Experiment 11 | *wild-type* | Vector Control | 5.8uM salubrinal | 0 | 101 | 100.0 |
| Experiment 11 | *wild-type* | Vector Control | 11.6uM salubrinal | 0 | 100 | 100.0 |
| Experiment 12 | *hsf-1(sy441)* | rsks-1 | 0.19%DMSO | 40 | 58 | 59.2 |
| Experiment 12 | *hsf-1(sy441)* | Vector Control | 0.19%DMSO | 90 | 40 | 30.8 |
| Experiment 12 | *hsf-1(sy441)* | Vector Control | 181nM harringtonine | 137 | 49 | 26.3 |
| Experiment 12 | *hsf-1(sy441)* | Vector Control | 362nM harringtonine | 126 | 37 | 22.7 |
| Experiment 12 | *hsf-1(sy441)* | Vector Control | 723nM harringtonine | 111 | 37 | 25.0 |
| Experiment 12 | *hsf-1(sy441)* | Vector Control | 1.4uM harringtonine | 110 | 21 | 16.0 |
| Experiment 12 | *hsf-1(sy441)* | Vector Control | 2.9uM harringtonine | 135 | 23 | 14.6 |
| Experiment 12 | *hsf-1(sy441)* | Vector Control | 185.2uM harringtonine | 102 | 0 | 0.0 |
| Experiment 12 | *hsf-1(sy441)* | Vector Control | 23.1uM harringtonine | 129 | 18 | 12.2 |
| Experiment 12 | *hsf-1(sy441)* | Vector Control | 46.3uM harringtonine | 98 | 16 | 14.0 |
| Experiment 12 | *hsf-1(sy441)* | Vector Control | 5.8uM harringtonine | 130 | 15 | 10.3 |
| Experiment 12 | *hsf-1(sy441)* | Vector Control | 92.6uM harringtonine | 112 | 14 | 11.1 |
| Experiment 12 | *hsf-1(sy441)* | Vector Control | 11.6uM harringtonine | 101 | 14 | 12.2 |
| Experiment 12 | *hsf-1(sy441)* | Vector Control |  | 54 | 91 | 62.8 |
| Experiment 12 | *hsf-1(sy441); rsks-1(mu482)* | Vector Control | 92.6uM harringtonine | 20 | 66 | 76.7 |
| Experiment 12 | *wild-type* | Vector Control | 0.19% DMSO | 0 | 66 | 100.0 |
| Experiment 12 | *wild-type* | Vector Control | 185.2uM harringtonine | 2 | 110 | 98.2 |
| Experiment 12 | *wild-type* | Vector Control | 46.3uM harringtonine | 0 | 91 | 100.0 |
| Experiment 12 | *wild-type* | Vector Control | 92.6uM harringtonine | 0 | 69 | 100.0 |
| Experiment 13 | *hsf-1(sy441)* | Vector Control | 0.012% DMSO | 83 | 4 | 4.6 |
| Experiment 13 | *hsf-1(sy441)* | Vector Control | 0.023% DMSO | 65 | 14 | 17.7 |
| Experiment 13 | *hsf-1(sy441)* | Vector Control | 0.046% DMSO | 96 | 18 | 15.8 |
| Experiment 13 | *hsf-1(sy441)* | Vector Control | 0.092% DMSO | 77 | 15 | 16.3 |
| Experiment 13 | *hsf-1(sy441)* | Vector Control | 0.19% DMSO | 97 | 13 | 11.8 |
| Experiment 13 | *hsf-1(sy441)* | rsks-1 | 0.19%DMSO | 68 | 23 | 25.3 |
| Experiment 13 | *hsf-1(sy441)* | Vector Control | 0.37% DMSO | 70 | 9 | 11.4 |
| Experiment 14 | *hsf-1(sy441)* | Vector Control | 3nM harringtonine | 83 | 14 | 14.4 |
| Experiment 14 | *hsf-1(sy441)* | Vector Control | 6nM harringtonine | 94 | 19 | 16.8 |
| Experiment 14 | *hsf-1(sy441)* | Vector Control | 11nM harringtonine | 80 | 20 | 20.0 |
| Experiment 14 | *hsf-1(sy441)* | Vector Control | 0.023% DMSO | 77 | 27 | 26.0 |
| Experiment 14 | *hsf-1(sy441)* | rsks-1 | 0.023%DMSO | 63 | 32 | 33.7 |
| Experiment 14 | *hsf-1(sy441)* | Vector Control | 23nM harringtonine | 78 | 11 | 12.4 |
| Experiment 14 | *hsf-1(sy441)* | Vector Control | 45nM harringtonine | 51 | 17 | 25.0 |
| Experiment 14 | *hsf-1(sy441)* | Vector Control | 90nM harringtonine | 84 | 28 | 25.0 |
| Experiment 14 | *hsf-1(sy441)* | Vector Control | 0.092% DMSO | 99 | 22 | 18.2 |
| Experiment 14 | *hsf-1(sy441)* | Vector Control | 181nM harringtonine | 55 | 25 | 31.3 |
| Experiment 14 | *hsf-1(sy441)* | Vector Control | 0.19% DMSO | 57 | 27 | 32.1 |
| Experiment 14 | *hsf-1(sy441)* | Vector Control | 362nM harringtonine | 64 | 21 | 24.7 |
| Experiment 14 | *hsf-1(sy441)* | Vector Control | 723nM harringtonine | 73 | 9 | 11.0 |
| Experiment 14 | *hsf-1(sy441)* | Vector Control | 1.4uM harringtonine | 70 | 17 | 19.5 |
| Experiment 14 | *hsf-1(sy441)* | Vector Control | 2.9uM harringtonine | 58 | 9 | 13.4 |
| Experiment 14 | *hsf-1(sy441)* | Vector Control | H20 | 62 | 36 | 36.7 |
| Experiment 15 | *hsf-1(sy441)* | Vector Control | 23nM salubrinal | 71 | 33 | 31.7 |
| Experiment 15 | *hsf-1(sy441)* | Vector Control | 0.046% DMSO | 77 | 27 | 26.0 |
| Experiment 15 | *hsf-1(sy441)* | Vector Control | 45nM salubrinal | 68 | 38 | 35.8 |
| Experiment 15 | *hsf-1(sy441)* | Vector Control | 0.092% DMSO | 72 | 25 | 25.8 |
| Experiment 15 | *hsf-1(sy441)* | Vector Control | 90nM salubrinal | 78 | 38 | 32.8 |
| Experiment 15 | *hsf-1(sy441)* | rsks-1 | 0.19%DMSO | 58 | 40 | 40.8 |
| Experiment 15 | *hsf-1(sy441)* | Vector Control | 0.19%DMSO | 85 | 25 | 22.7 |
| Experiment 15 | *hsf-1(sy441)* | Vector Control | 181nM salubrinal | 80 | 24 | 23.1 |
| Experiment 15 | *hsf-1(sy441)* | Vector Control | 362nM salubrinal | 97 | 50 | 34.0 |
| Experiment 15 | *hsf-1(sy441)* | Vector Control | 723nM salubrinal | 108 | 20 | 15.6 |
| Experiment 15 | *hsf-1(sy441)* | Vector Control | 1.4uM salubrinal | 58 | 15 | 20.5 |
| Experiment 15 | *hsf-1(sy441)* | Vector Control | 2.9uM salubrinal | 78 | 18 | 18.8 |
| Experiment 15 | *hsf-1(sy441)* | Vector Control | 23.1uM salubrinal | 127 | 1 | 0.8 |
| Experiment 15 | *hsf-1(sy441)* | Vector Control | 5.8uM salubrinal | 71 | 21 | 22.8 |
| Experiment 15 | *hsf-1(sy441)* | Vector Control | 11.6uM salubrinal | 97 | 2 | 2.0 |
| Experiment 15 | *hsf-1(sy441)* | Vector Control | H2O | 88 | 63 | 41.7 |
| Experiment 16 | *hsf-1(sy441)* | Vector Control | 3nM harringtonine | 69 | 49 | 41.5 |
| Experiment 16 | *hsf-1(sy441)* | Vector Control | 6nM harringtonine | 73 | 33 | 31.1 |
| Experiment 16 | *hsf-1(sy441)* | Vector Control | 11nM harringtonine | 50 | 26 | 34.2 |
| Experiment 16 | *hsf-1(sy441)* | Vector Control | 0.023% DMSO | 82 | 25 | 23.4 |
| Experiment 16 | *hsf-1(sy441)* | rsks-1 | 0.023%DMSO | 24 | 64 | 72.7 |
| Experiment 16 | *hsf-1(sy441)* | Vector Control | 23nM harringtonine | 87 | 29 | 25.0 |
| Experiment 16 | *hsf-1(sy441)* | Vector Control | 45nM harringtonine | 82 | 47 | 36.4 |
| Experiment 16 | *hsf-1(sy441)* | Vector Control | 90nM harringtonine | 47 | 31 | 39.7 |
| Experiment 16 | *hsf-1(sy441)* | Vector Control | 0.092% DMSO | 98 | 36 | 26.9 |
| Experiment 16 | *hsf-1(sy441)* | Vector Control | 181nM harringtonine | 43 | 31 | 41.9 |
| Experiment 16 | *hsf-1(sy441)* | Vector Control | 0.19% DMSO | 61 | 25 | 29.1 |
| Experiment 16 | *hsf-1(sy441)* | Vector Control | 362nM harringtonine | 77 | 27 | 26.0 |
| Experiment 16 | *hsf-1(sy441)* | Vector Control | 723nM harringtonine | 52 | 24 | 31.6 |
| Experiment 16 | *hsf-1(sy441)* | Vector Control | 1.4uM harringtonine | 73 | 20 | 21.5 |
| Experiment 16 | *hsf-1(sy441)* | Vector Control | 2.9uM harringtonine | 76 | 22 | 22.4 |
| Experiment 16 | *hsf-1(sy441)* | Vector Control | H20 | 64 | 49 | 43.4 |
| Experiment 17 | *hsf-1(sy441)* | Vector Control | 6nM salubrinal | 122 | 47 | 27.8 |
| Experiment 17 | *hsf-1(sy441)* | Vector Control | 6nM salubrinal | 95 | 22 | 18.8 |
| Experiment 17 | *hsf-1(sy441)* | Vector Control | 23nM salubrinal | 83 | 28 | 25.2 |
| Experiment 17 | *hsf-1(sy441)* | Vector Control | 23nM salubrinal | 85 | 18 | 17.5 |
| Experiment 17 | *hsf-1(sy441)* | Vector Control | 23nM salubrinal | 94 | 22 | 19.0 |
| Experiment 17 | *hsf-1(sy441)* | Vector Control | 0.19% DMSO | 120 | 17 | 12.4 |
| Experiment 17 | *hsf-1(sy441)* | Vector Control | 0.19% DMSO | 118 | 47 | 28.5 |
| Experiment 17 | *hsf-1(sy441)* | Vector Control | 0.19% DMSO | 107 | 26 | 19.5 |
| Experiment 17 | *hsf-1(sy441)* | rsks-1 | 0.19%DMSO | 54 | 66 | 55.0 |
| Experiment 17 | *hsf-1(sy441)* | Vector Control | 362nM salubrinal | 82 | 18 | 18.0 |
| Experiment 17 | *hsf-1(sy441)* | Vector Control | 362nM salubrinal | 106 | 43 | 28.9 |
| Experiment 17 | *hsf-1(sy441)* | Vector Control | 362nM salubrinal | 130 | 6 | 4.4 |
| Experiment 17 | *hsf-1(sy441)* | Vector Control | 723nM salubrinal | 96 | 39 | 28.9 |
| Experiment 17 | *hsf-1(sy441)* | Vector Control | 723nM salubrinal | 112 | 29 | 20.6 |
| Experiment 17 | *hsf-1(sy441)* | Vector Control | 723nM salubrinal | 131 | 20 | 13.2 |
| Experiment 17 | *hsf-1(sy441)* | Vector Control | 11.6uM salubrinal | 110 | 1 | 0.9 |
| Experiment 17 | *hsf-1(sy441)* | Vector Control | 11.6uM salubrinal | 70 | 1 | 1.4 |
| Experiment 18 | *hsf-1(sy441)* | Vector Control | 3nM harringtonine | 51 | 8 | 13.6 |
| Experiment 18 | *hsf-1(sy441)* | Vector Control | 3nM harringtonine | 36 | 10 | 21.7 |
| Experiment 18 | *hsf-1(sy441)* | Vector Control | 3nM harringtonine | 43 | 11 | 20.4 |
| Experiment 18 | *hsf-1(sy441)* | Vector Control | 0.023% DMSO | 52 | 6 | 10.3 |
| Experiment 18 | *hsf-1(sy441)* | Vector Control | 0.023% DMSO | 39 | 8 | 17.0 |
| Experiment 18 | *hsf-1(sy441)* | Vector Control | 0.023% DMSO | 60 | 4 | 6.3 |
| Experiment 18 | *hsf-1(sy441)* | rsks-1 | 0.023%DMSO | 29 | 10 | 25.6 |
| Experiment 18 | *hsf-1(sy441)* | rsks-1 | 0.023%DMSO | 30 | 14 | 31.8 |
| Experiment 18 | *hsf-1(sy441)* | rsks-1 | 0.023%DMSO | 36 | 10 | 21.7 |
| Experiment 18 | *hsf-1(sy441)* | Vector Control | 90nM harringtonine | 52 | 8 | 13.3 |
| Experiment 18 | *hsf-1(sy441)* | Vector Control | 90nM harringtonine | 42 | 7 | 14.3 |
| Experiment 18 | *hsf-1(sy441)* | Vector Control | 90nM harringtonine | 53 | 0 | 0.0 |
| Experiment 18 | *hsf-1(sy441)* | Vector Control | 181nM harringtonine | 43 | 5 | 10.4 |
| Experiment 18 | *hsf-1(sy441)* | Vector Control | 181nM harringtonine | 54 | 2 | 3.6 |
| Experiment 18 | *hsf-1(sy441)* | Vector Control | 181nM harringtonine | 40 | 9 | 18.4 |
| Experiment 18 | *hsf-1(sy441)* | Vector Control | 5.8uM harringtonine | 51 | 1 | 1.9 |
| Experiment 18 | *hsf-1(sy441)* | Vector Control | 5.8uM harringtonine | 56 | 2 | 3.4 |
| Experiment 18 | *hsf-1(sy441)* | Vector Control | 5.8uM harringtonine | 40 | 2 | 4.8 |
| Experiment 19 | *hsf-1(sy441)* | Vector Control | 3nM harringtonine | 73 | 27 | 27.0 |
| Experiment 19 | *hsf-1(sy441)* | Vector Control | 3nM harringtonine | 103 | 12 | 10.4 |
| Experiment 19 | *hsf-1(sy441)* | Vector Control | 3nM harringtonine | 113 | 10 | 8.1 |
| Experiment 19 | *hsf-1(sy441)* | Vector Control | 0.023% DMSO | 103 | 8 | 7.2 |
| Experiment 19 | *hsf-1(sy441)* | Vector Control | 0.023% DMSO | 68 | 24 | 26.1 |
| Experiment 19 | *hsf-1(sy441)* | Vector Control | 0.023% DMSO | 107 | 9 | 7.8 |
| Experiment 19 | *hsf-1(sy441)* | rsks-1 | 0.023% DMSO | 82 | 53 | 39.3 |
| Experiment 19 | *hsf-1(sy441)* | rsks-1 | 0.023% DMSO | 58 | 55 | 48.7 |
| Experiment 19 | *hsf-1(sy441)* | rsks-1 | 0.023% DMSO | 80 | 10 | 11.1 |
| Experiment 19 | *hsf-1(sy441)* | Vector Control | 90nM harringtonine | 107 | 15 | 12.3 |
| Experiment 19 | *hsf-1(sy441)* | Vector Control | 90nM harringtonine | 107 | 15 | 12.3 |
| Experiment 19 | *hsf-1(sy441)* | Vector Control | 90nM harringtonine | 99 | 20 | 16.8 |
| Experiment 19 | *hsf-1(sy441)* | Vector Control | 181nM harringtonine | 96 | 8 | 7.7 |
| Experiment 19 | *hsf-1(sy441)* | Vector Control | 181nM harringtonine | 90 | 6 | 6.3 |
| Experiment 19 | *hsf-1(sy441)* | Vector Control | 181nM harringtonine | 93 | 13 | 12.3 |
| Experiment 19 | *hsf-1(sy441)* | Vector Control | 5.8uM harringtonine | 81 | 6 | 6.9 |
| Experiment 19 | *hsf-1(sy441)* | Vector Control | 5.8uM harringtonine | 94 | 4 | 4.1 |
| Experiment 19 | *hsf-1(sy441)* | Vector Control | 5.8uM harringtonine | 127 | 7 | 5.2 |
| Experiment 20 | *hsf-1(sy441)* | Vector Control | 6nM salubrinal | 109 | 20 | 15.5 |
| Experiment 20 | *hsf-1(sy441)* | Vector Control | 6nM salubrinal | 88 | 23 | 20.7 |
| Experiment 20 | *hsf-1(sy441)* | Vector Control | 6nM salubrinal | 87 | 7 | 7.4 |
| Experiment 20 | *hsf-1(sy441)* | Vector Control | 0.19% DMSO | 72 | 10 | 12.2 |
| Experiment 20 | *hsf-1(sy441)* | Vector Control | 0.19% DMSO | 95 | 12 | 11.2 |
| Experiment 20 | *hsf-1(sy441)* | Vector Control | 0.19% DMSO | 142 | 20 | 12.3 |
| Experiment 20 | *hsf-1(sy441)* | rsks-1 | 0.19% DMSO | 46 | 27 | 37.0 |
| Experiment 20 | *hsf-1(sy441)* | rsks-1 | 0.19% DMSO | 80 | 34 | 29.8 |
| Experiment 20 | *hsf-1(sy441)* | rsks-1 | 0.19% DMSO | 60 | 57 | 48.7 |
| Experiment 20 | *hsf-1(sy441)* | Vector Control | 362nM salubrinal | 81 | 14 | 14.7 |
| Experiment 20 | *hsf-1(sy441)* | Vector Control | 362nM salubrinal | 54 | 10 | 15.6 |
| Experiment 20 | *hsf-1(sy441)* | Vector Control | 362nM salubrinal | 33 | 6 | 15.4 |
| Experiment 20 | *hsf-1(sy441)* | Vector Control | 723nM salubrinal | 32 | 4 | 11.1 |
| Experiment 20 | *hsf-1(sy441)* | Vector Control | 723nM salubrinal | 80 | 8 | 9.1 |
| Experiment 20 | *hsf-1(sy441)* | Vector Control | 723nM salubrinal | 128 | 16 | 11.1 |
| Experiment 20 | *hsf-1(sy441)* | Vector Control | 11.6uM salubrinal | 123 | 1 | 0.8 |
| Experiment 20 | *hsf-1(sy441)* | Vector Control | 11.6uM salubrinal | 74 | 2 | 2.6 |
| Experiment 20 | *hsf-1(sy441)* | Vector Control | 11.6uM salubrinal | 139 | 5 | 3.5 |
| Experiment 21 | *hsf-1(sy441)* | Vector Control |  | 79 | 23 | 22.5 |
| Experiment 21 | *hsf-1(sy441)* | rsks-1 |  | 44 | 32 | 42.1 |
| Experiment 21 | *hsf-1(sy441)* | rps-6 50% |  | 63 | 0 | 0.0 |
| Experiment 21 | *hsf-1(sy441)* | rps-6 25% |  | 95 | 4 | 4.0 |
| Experiment 21 | *hsf-1(sy441)* | Vector Control | 0.19% DMSO | 85 | 5 | 5.6 |
| Experiment 21 | *hsf-1(sy441)* | rsks-1 | 0.19% DMSO | 71 | 37 | 34.3 |
| Experiment 21 | *hsf-1(sy441)* | Vector Control | 185.2uM harringtonine | 92 | 1 | 1.1 |
| Experiment 22 | *hsf-1(sy441)* | Vector Control |  | 65 | 49 | 43.0 |
| Experiment 22 | *hsf-1(sy441)* | rsks-1 |  | 46 | 81 | 63.8 |
| Experiment 22 | *hsf-1(sy441)* | rps-6 50% |  | 98 | 0 | 0.0 |
| Experiment 22 | *hsf-1(sy441)* | rps-6 25% |  | 93 | 4 | 4.1 |
| Experiment 22 | *hsf-1(sy441)* | Vector Control | 0.19% DMSO | 67 | 18 | 21.2 |
| Experiment 22 | *hsf-1(sy441)* | rsks-1 | 0.19% DMSO | 30 | 42 | 58.3 |
| Experiment 23 | *hsf-1(sy441)* | Vector Control | 185.2uM harringtonine | 64 | 0 | 0.0 |
| Experiment 23 | *hsf-1(sy441)* | Vector Control |  | 50 | 23 | 31.5 |
| Experiment 23 | *hsf-1(sy441)* | rsks-1 |  | 36 | 46 | 56.1 |
| Experiment 23 | *hsf-1(sy441)* | rps-6 50% |  | 91 | 2 | 2.2 |
| Experiment 23 | *hsf-1(sy441)* | rps-6 25% |  | 91 | 6 | 6.2 |
| Experiment 23 | *hsf-1(sy441)* | Vector Control | 0.19% DMSO | 37 | 19 | 33.9 |
| Experiment 23 | *hsf-1(sy441)* | rsks-1 | 0.19% DMSO | 28 | 28 | 50.0 |
| Experiment 23 | *hsf-1(sy441)* | Vector Control | 185.2uM harringtonine | 61 | 0 | 0.0 |
